# Supplementary material
Source: MDPI journal article supplement (https://www.mdpi.com/2073-4344/13/5/828)
Supplement: s1 [file s1 › catalysts-2343801-supplementary.pdf]

# Atmospheric and Efficient Selective Oxidation of Ethylbenzene Catalyzed by Cobalt Oxides Supported on Mesoporous Carbon Nitride

Ye Zhu, Xue-Wen Zhang, Fei Wang, Bing Xue \* and Jie Xu \*

Jiangsu Key Laboratory of Advanced Catalytic Materials and Technology, School of Petrochemical Engineering, Changzhou University, Gehu Middle Road 21, Changzhou 213164, China

\* Correspondence: xuebing@cczu.edu.cn (B.X.); jiexu@cczu.edu.cn (J.X.); Tel.: +86-519-86330135 (B.X. & J.X)

## Preparation of eg-C<sub>3</sub>N<sub>4</sub> and FDU-12

**eg-C<sub>3</sub>N<sub>4</sub>:** Dicyandiamide (5 g) was added into a crucible with a lid and then heated at a rate of 3 °C·min<sup>-1</sup> to reach a temperature of 550 °C and then held for another 4 h. After cooling down to room temperature, the obtained pale yellow solid was labeled as g-C<sub>3</sub>N<sub>4</sub>.

Exfoliated g-C<sub>3</sub>N<sub>4</sub> materials were prepared by a thermal exfoliation method. Briefly, g-C<sub>3</sub>N<sub>4</sub> solid (2 g) was placed into a crucible with a lid and then heated at 550 °C for 2 h. After that, the resultant powder with faint yellow was designated as eg-C<sub>3</sub>N<sub>4</sub>.

**FDU-12:** FDU-12 material was prepared using a Pluronic F127 (EO<sub>106</sub>PO<sub>70</sub>EO<sub>106</sub>) triblock copolymer surfactant, and 1,3,5-trimethylbenzene (TMB) as an organic swelling agent. In brief, 2.0 g of F127, and 5.0 g of KCl were dissolved in 120 mL of HCl (a.q. 2 mol·L<sup>-1</sup>). After that, 2.4 g of TMB and 8.3 g of tetraethyl orthosilicate were added, and the mixture was further stirred at 38 °C for 24 h. The obtained milky solution was transferred into an autoclave and heated in an oven at 140 °C for 24 h. Afterward, the white precipitate was filtered off and then rinsed with distilled water three times to remove KCl. After drying overnight at 60 °C, the resultant solid was calcined at 550 °C for 5 h to remove the surfactant.

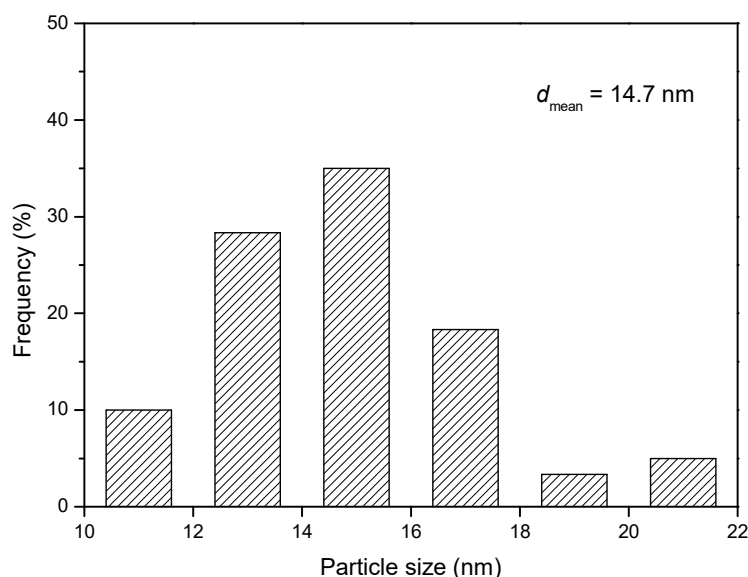

**Figure S1.** Particle size histogram of CoO<sub>x</sub> in 3CoO<sub>x</sub>/mpg-C<sub>3</sub>N<sub>4</sub>-400.

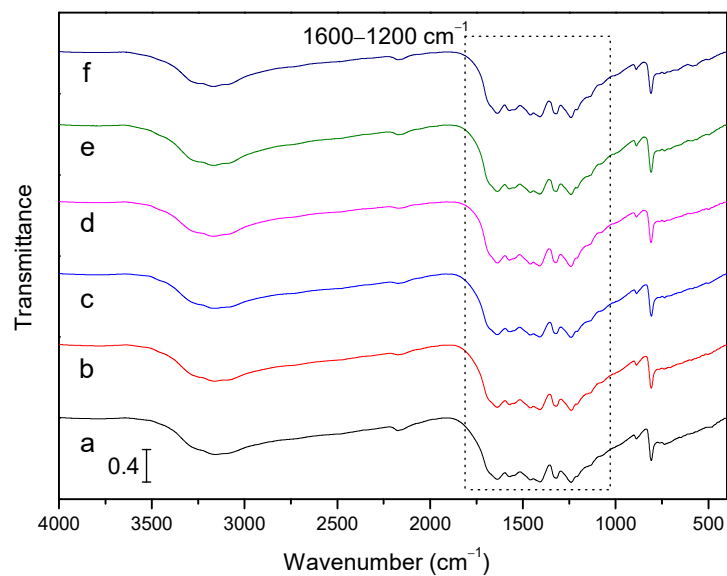

**Figure S2.** FT-IR spectra of mpg-C<sub>3</sub>N<sub>4</sub> (a), 3CoO<sub>x</sub>/mpg-C<sub>3</sub>N<sub>4</sub>-300 (b), 3CoO<sub>x</sub>/mpg-C<sub>3</sub>N<sub>4</sub>-350 (c), 3CoO<sub>x</sub>/mpg-C<sub>3</sub>N<sub>4</sub>-400 (d), 3CoO<sub>x</sub>/mpg-C<sub>3</sub>N<sub>4</sub>-450 (e), and 3CoO<sub>x</sub>/mpg-C<sub>3</sub>N<sub>4</sub>-500 (f) materials.

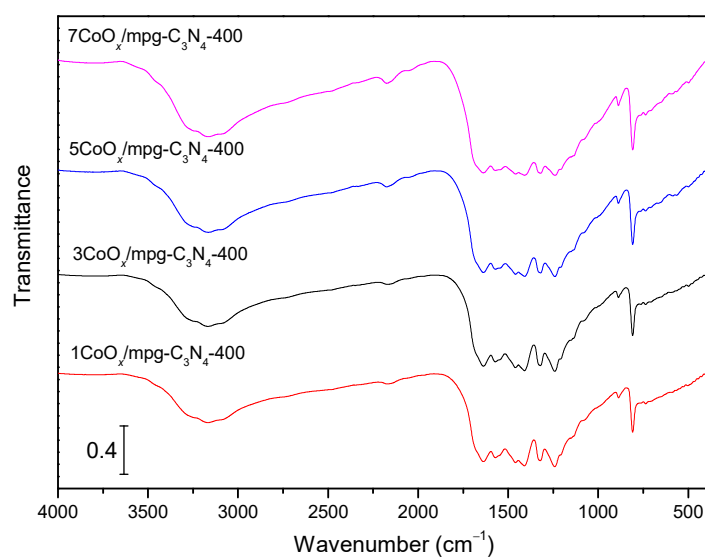

**Figure S3.** FT-IR spectra of mCoO<sub>x</sub>/mpg-C<sub>3</sub>N<sub>4</sub> materials.

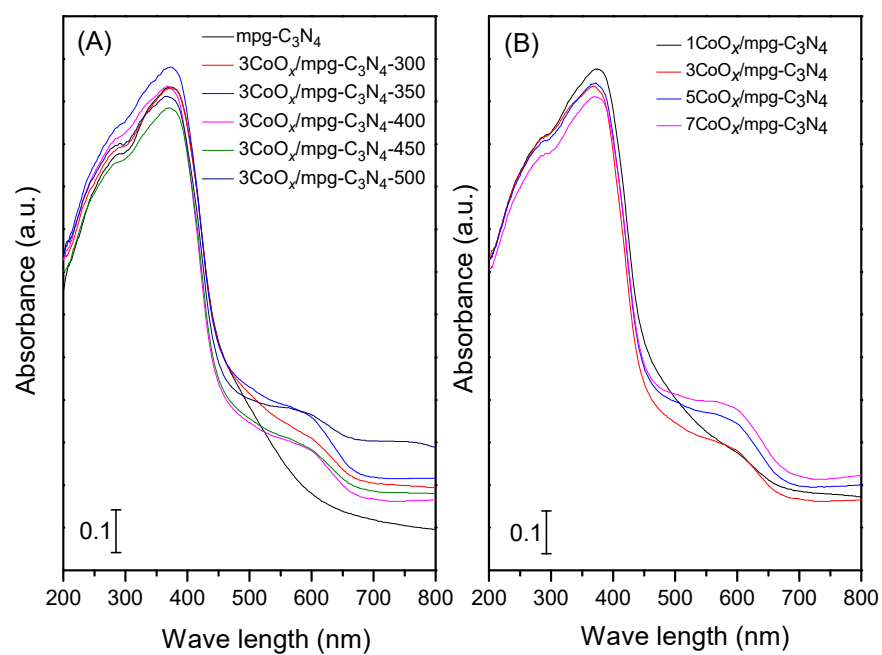

**Figure S4.** UV-vis spectra of mpg-C<sub>3</sub>N<sub>4</sub> (A) and CoO<sub>x</sub>/mpg-C<sub>3</sub>N<sub>4</sub> materials (B).

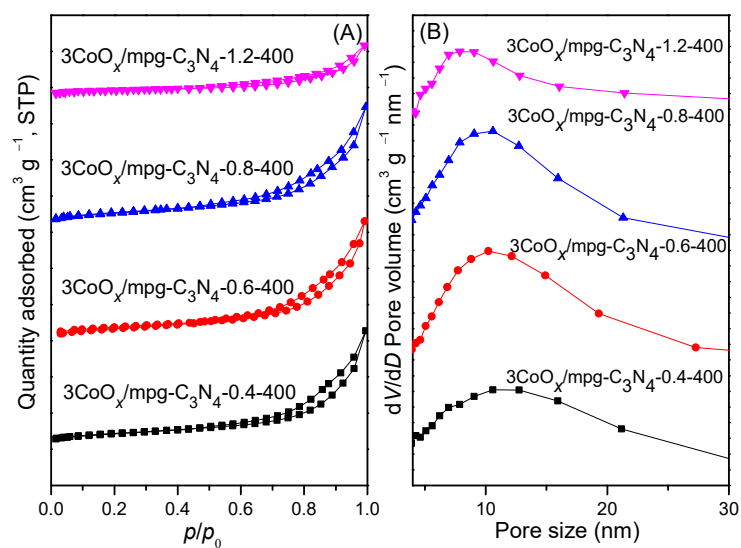

**Figure S5.** N<sub>2</sub> adsorption-desorption isotherms (A) of 3CoO<sub>x</sub>/mpg-C<sub>3</sub>N<sub>4</sub>-r materials and the corresponding pore size distributions (B).

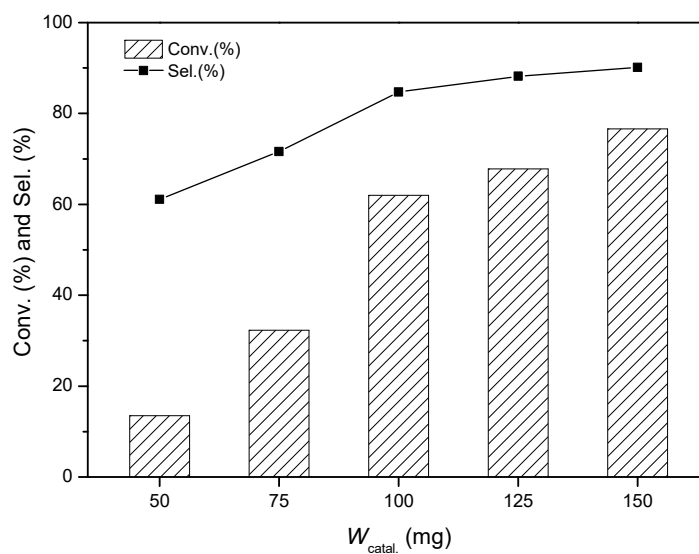

**Figure S6.** Catalytic performances with various feeding doses of 3CoO<sub>x</sub>/mpg-C<sub>3</sub>N<sub>4</sub>. Reaction conditions: 10 mmol of EB, 30 mmol of TBHP, 4 mL of acetonitrile,  $T = 100\text{ }^{\circ}\text{C}$ , and  $t = 10\text{ h}$ .

**Table S1.** Molar ratios of C/N of mpg-C<sub>3</sub>N<sub>4</sub> and 3CoO<sub>x</sub>/mpg-C<sub>3</sub>N<sub>4</sub>- $T$  materials.

| Material                                                   | $n\text{C}/n\text{N}^{\text{a}}$ |
|------------------------------------------------------------|----------------------------------|
| mpg-C <sub>3</sub> N <sub>4</sub>                          | 0.85                             |
| 3CoO <sub>x</sub> /mpg-C <sub>3</sub> N <sub>4</sub> -350  | 0.86                             |
| 3CoO <sub>x</sub> /mpg-C <sub>3</sub> N <sub>4</sub> -400  | 0.84                             |
| 3CoO <sub>x</sub> /mpg-C <sub>3</sub> N <sub>4</sub> -450  | 0.83                             |
| 3CoO <sub>x</sub> /mpg-C <sub>3</sub> N <sub>4</sub> -400R | 0.83                             |

<sup>a</sup> Calculated based on the peaks of XPS survey.

**Table S2.** Surface areas and porous properties of 3CoO<sub>x</sub>/mpg-C<sub>3</sub>N<sub>4</sub>- $r$  materials.

| Sample                                                    | $S_{\text{BET}}$ (m <sup>2</sup> ·g <sup>-1</sup> ) | Pore size (nm) <sup>a</sup> | Pore volume (cm <sup>3</sup> ·g <sup>-1</sup> ) |
|-----------------------------------------------------------|-----------------------------------------------------|-----------------------------|-------------------------------------------------|
| 3CoO <sub>x</sub> /mpg-C <sub>3</sub> N <sub>4</sub> -0.4 | 65                                                  | 10.6                        | 0.15                                            |
| 3CoO <sub>x</sub> /mpg-C <sub>3</sub> N <sub>4</sub> -0.6 | 70                                                  | 10.2                        | 0.26                                            |
| 3CoO <sub>x</sub> /mpg-C <sub>3</sub> N <sub>4</sub> -0.8 | 74                                                  | 10.6                        | 0.16                                            |
| 3CoO <sub>x</sub> /mpg-C <sub>3</sub> N <sub>4</sub> -1.2 | 34                                                  | 7.9                         | 0.07                                            |

<sup>a</sup> Determined by the adsorption branches.

**Table S3.** Catalytic performances of various  $m\text{CoO}_x/\text{mpg-C}_3\text{N}_4$  catalysts in the selective oxidation of EB<sup>a</sup>.

| Catalyst                                               | Con. (%) | Sel. (%) |      |      |
|--------------------------------------------------------|----------|----------|------|------|
|                                                        |          | AP       | PE   | BA   |
| <b>1CoO<sub>x</sub>/mpg-C<sub>3</sub>N<sub>4</sub></b> | 20.7     | 75.2     | 15.0 | 9.8  |
| 3CoO <sub>x</sub> /mpg-C <sub>3</sub> N <sub>4</sub>   | 62.0     | 84.7     | 4.8  | 10.6 |
| 5CoO <sub>x</sub> /mpg-C <sub>3</sub> N <sub>4</sub>   | 63.7     | 86.5     | 10.3 | 3.2  |
| 7CoO <sub>x</sub> /mpg-C <sub>3</sub> N <sub>4</sub>   | 64.5     | 90.2     | 7.0  | 2.8  |

<sup>a</sup> Reaction conditions: 10 mmol of EB, 30 mmol of TBHP,  $W_{\text{catal.}} = 100$  mg, 4 mL of acetonitrile,  $T = 100$  °C, and  $t = 10$  h.
